# Supplementary material for: Amorphous V2O5–P2O5 as high-voltage cathodes for magnesium batteries
Source: Royal Society of Chemistry journal article supplement (doi:10.1039/c5cc07161e), 2015-01-01
Supplement: c5cc07161e1.pdf [file c5cc07161e1.pdf]

Electronic Supplementary Information (ESI): Amorphous  $V_2O_5$ - $P_2O_5$  as high-voltage cathodes for magnesium batteries

Timothy S. Arthur,<sup>\*a</sup> Keiko Kato,<sup>a</sup> Jason Germain,<sup>a</sup> Jinghua Guo,<sup>b</sup> Per-Anders Glans,<sup>b</sup> Yi-Sheng Liu,<sup>b</sup> Daniel Holmes,<sup>c</sup> Xudon Fan,<sup>d</sup> and Fuminori Mizuno<sup>a</sup>

Experimental Methods:

*Materials:*  $V_2O_5$  and  $P_2O_5$  powder were purchased from Sigma-Aldrich and used as received. 1 M  $Mg(ClO_4)_2$  / Acetonitrile with less than 50 ppm of water was purchased from KishidaChemicals. All chemicals were stored in an Ar-filled glovebox.

*Ball-milling:*  $V_2O_5$  and  $P_2O_5$  powders (total mass of 1 g) were loaded into a 45 ml  $ZrO_2$  ball-milling vessel with 10 x 10mm and 10 x 5mm  $ZrO_2$  balls in an Ar-glove box. Powders were milled for 20 h at 370 rpm using Fritsch© Planetary Ball-mill P7.

*Cathode preparation:* The cathode was prepared by mixing the active material or  $SiO_2$ , Acetylene Black (HS-100, Denki Kagaku Kogyo) and PVDF binder (KF polymer, 5 wt % in NMP, Kureha) in a 2:1:1 wt. ratio. The resulting paste was painted onto a SUS mesh current collector, dried for 1 h at 120 °C and finally dried under vacuum for 12 h at 120 °C. Typical active material loading is ~ 2 mg/cm<sup>2</sup>.

*Methods:* X-ray photoelectron spectroscopy was collected using a Phi 5600 and analyzed using the Multipack software. For peak de-convolution, the spectra were aligned using a  $SiO_2$  standard and FWHM of the fitted peaks were constrained within 1.5-1.7 eV. X-ray diffraction was collected on a Rigaku SmartLab system. Differential scanning calorimetry was collected on a TA Instruments DSC-Q100 in hermetically sealed aluminum pans. The temperature was ramped from 30 °C to 450 °C at a rate of 5 °C min<sup>-1</sup>, then reversed from 450 °C to 30 °C and finally from 30 °C to 450 °C again. X-ray absorption spectra were collected at beamline 6.3.1.2 at the Advanced Light Source using a total electron yield (TEY) detector. Energies are aligned by periodically collecting an O K-edge spectra of a  $TiO_2$  reference. Scanning electron microscopy was collected with a JEOL 77800F FE-SEM equipped with an energy dispersive X-ray detector. Transmission electron microscopy was collected on a JOEL 2200FS microscope at the Center for Advanced Microscopy at Michigan State University. TEM grids were prepared by drop-casting the cathode from acetonitrile. Magic-angle spinning nuclear magnetic resonance was collected on a Varian Infinity-Plus 400 MHz and aligned to a  $H_3PO_4$  standard.

*Electrochemistry:* Three-electrode cyclic voltammetry (CV) was performed in an argon-filled glovebox. Magnesium foil was used as counter electrode,  $Ag/Ag^+$  (0.1 M  $AgNO_3$  and 0.01 M tetrabutylammonium perchlorate as reference solution) was used as a reference electrode, and 1 M  $Mg(ClO_4)_2$  / Acetonitrile was used as electrolyte. CV was tested within [-1.6V, 1V] potential window at the scanning rate of 0.25 mV s<sup>-1</sup>. Potentials are converted to  $Mg/Mg^{2+}$  by using a ferrocene standard (0.087 V vs.  $Ag/Ag^+$ ). The current density (mA g<sup>-1</sup>) of the cathodes is normalized to the mass of the active material, or  $SiO_2$ , in the cathode.

i. Additional Results:

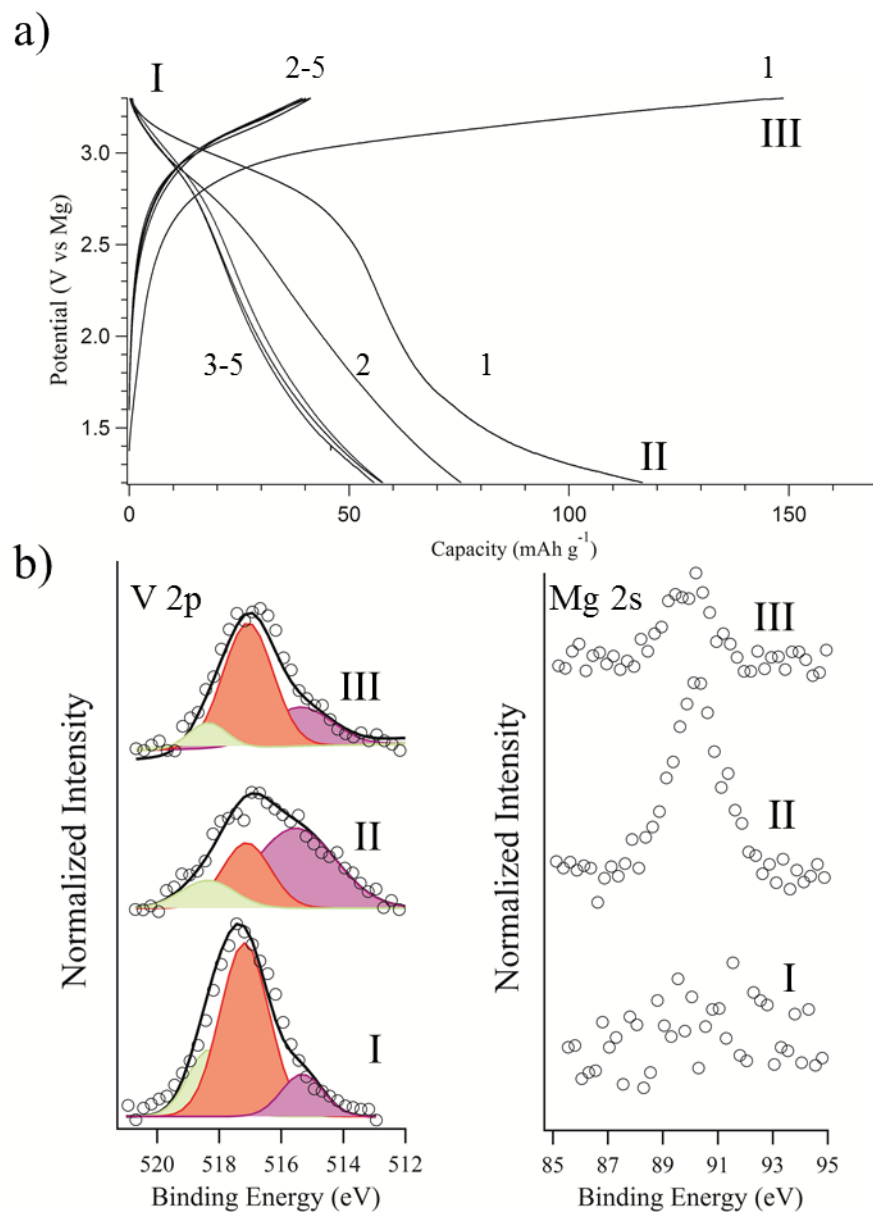

**Fig. S1** – a) Three-electrode galvanic charge/discharge of 75:25  $\text{V}_2\text{O}_5:\text{P}_2\text{O}_5$ . b) V 2p and Mg 2s XPS of the electrode taken at I-As-prepared, II-After 1<sup>st</sup> discharge and III-After 1<sup>st</sup> charge.

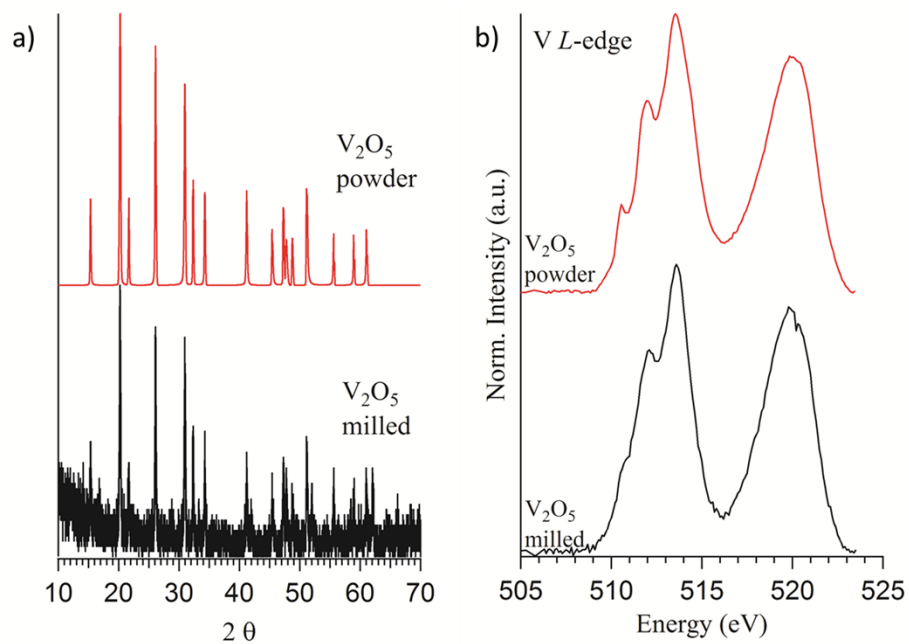

**Fig. S2** – a) XRD patterns and b) V  $L_3$  NEXAFS for  $V_2O_5$  powders before and after milling.

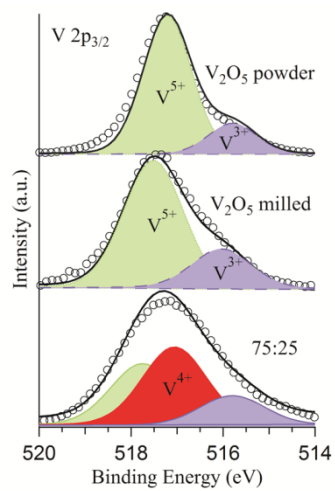

**Fig. S3** - V  $2p_{3/2}$  XPS spectra and peak-fitting of commercial and milled  $V_2O_5$  compared to a  $V_2O_5$ :  $P_2O_5$  (75:25) powder.

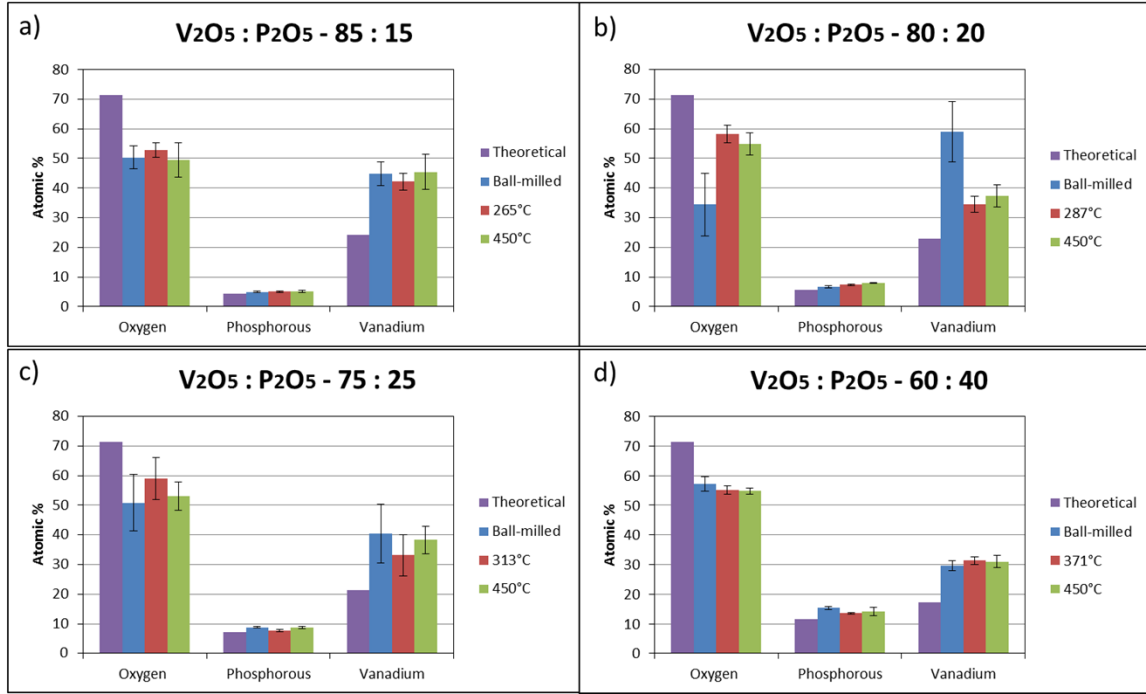

**Fig. S4** - Atomic ratios calculated by Energy dispersive X-ray spectroscopy (EDS) for a) 85:15, b) 80:20, c) 75:25 and d) 60:40  $V_2O_5 : P_2O_5$  ratios.

Table S1 –  $T_g$ ,  $\Delta T$  and  $T_c$  temperatures for the amorphous  $V_2O_5$ - $P_2O_5$  system

| V:P   | $T_g$ (°C) | $T_{c1}$ (°C) | $\Delta T(T_{c1}-T_g)$ | $T_{c2}$ (°C) |
|-------|------------|---------------|------------------------|---------------|
| 85:15 | 234.7      | 265.2         | 30.6                   | 423.1         |
| 80:20 | 236.1      | 287.0         | 51.0                   | 390.8         |
| 75:25 | 244.5      | 313.3         | 68.9                   | 391.4         |
| 70:30 | 256.8      | 409.4         | 152.7                  | ----          |
| 65:35 | 285.5      | 389.3         | 103.8                  | ----          |
| 60:40 | 309.8      | 371.3         | 61.5                   | ----          |

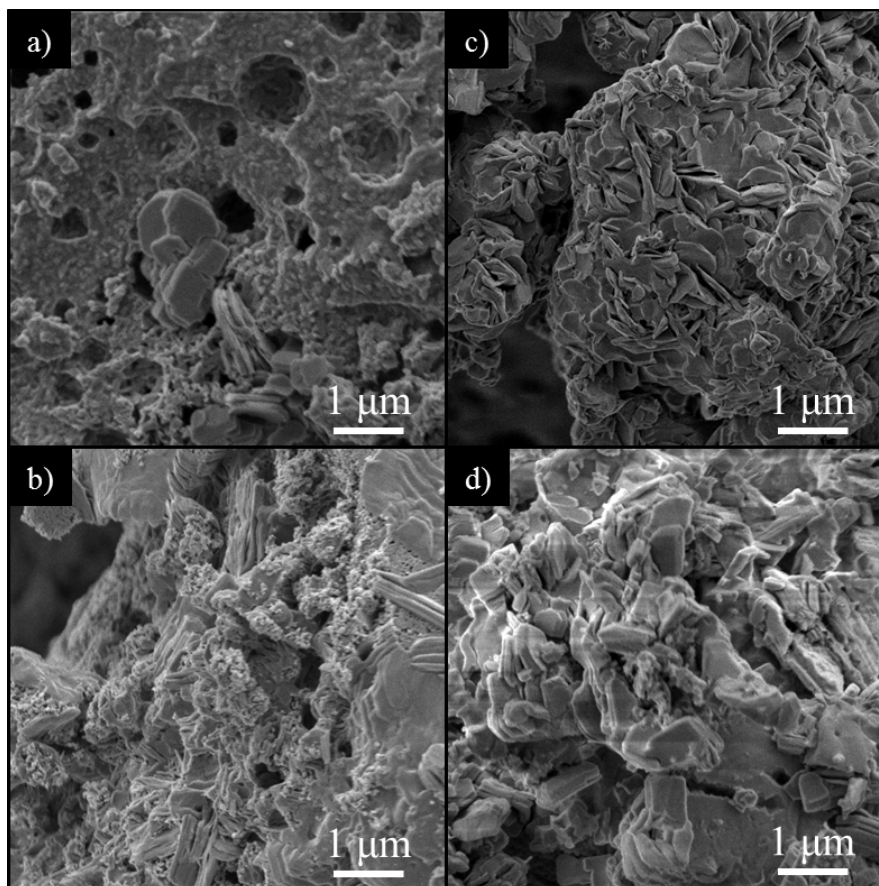

**Fig. S5** – SEM images of a  $\text{V}_2\text{O}_5$ :  $\text{P}_2\text{O}_5$  (75:25) powders annealed to a) 313 °C and b) 450 °C, and  $\text{V}_2\text{O}_5$ :  $\text{P}_2\text{O}_5$  (60:40) annealed to c) 371 °C and d) 450 °C.

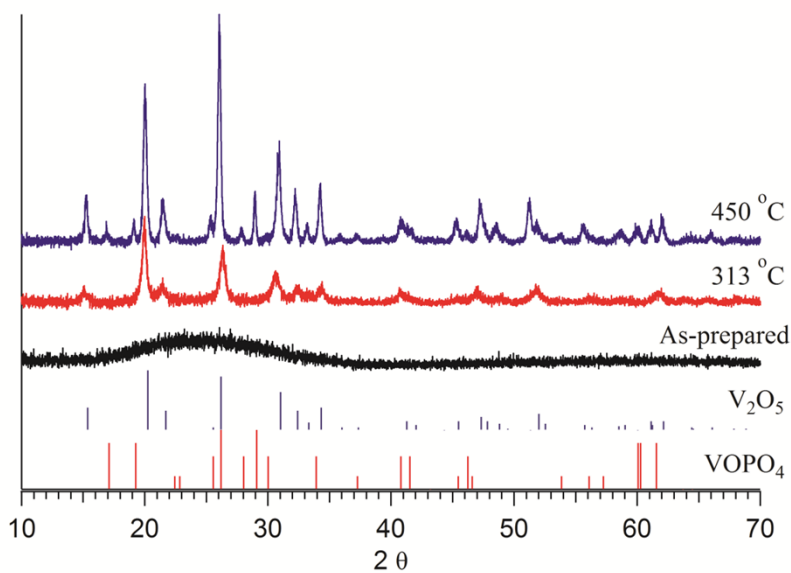

**Fig. S6** – XRD patterns for  $\text{V}_2\text{O}_5$ : $\text{P}_2\text{O}_5$  (75:25) as prepared and after annealing at 313 °C and 450 °C. The reference patterns are assigned to PDF 00-009-0387 for  $\text{V}_2\text{O}_5$  and PDF 00-027-0948 for  $\text{VOPO}_4$ .
